# Supplementary material for: Enhancing the stability of zinc-ion batteries with titanium-doped VO2 cathode materials
Source: Royal Society of Chemistry journal article supplement (doi:10.1039/d4tc02864c), 2024-01-01
Supplement: d4tc02864c1.pdf [file d4tc02864c1.pdf]

## **Enhancing stability in zinc-ion batteries with titanium- doped VO<sub>2</sub> cathode materials**

Shuling Liu\*, Wenhao Zhang, Jiale Guo, Zixiang Zhou, Yue Wang, Yulu Yang

*Department of Chemistry and Chemical Engineering, Shaanxi Collaborative  
Innovation Center of Industrial Auxiliary Chemistry & Technology, Key Laboratory  
of Auxiliary Chemistry and Technology for Chemical Industry, Ministry of  
Education, Shaanxi University of Science and Technology, Xi'an, Shaanxi 710021,  
China*

\*Corresponding author.

E-mail address: liushuling@sust.edu.cn

### *Chemicals*

The following reagents are used without further purification. vanadium pentoxide (Vanadium(V) oxide, AR, 99.0%), Glucose (AR), Titanium sulfate dihydrate ( $\text{Ti}(\text{SO}_4)_2 \cdot 2\text{H}_2\text{O}$ , AR, 96.0%), Hexadecyl trimethyl ammonium bromide (Cetyltrimethyl Ammonium Bromide (CTAB), AR, 99.0%), Hydrogen peroxide (30 wt%) and double distilled water.

### *Material characterization*

The crystalline phase of the samples was analyzed by an X-ray powder diffractometer (Bragg-Brentano, Bruker D8 Advance). X-ray photoelectron spectroscopy (XPS) measurements were performed using a Thermo Scientific ESCALAB 250Xi instrument. To prepare electrodes for ex-situ XRD and XPS measurements, the cells were disassembled at specific voltages, followed by multiple washes with deionized water and dried in vacuum. The samples were imaged by field emission scanning electron microscopy (SEM) and field emission transmission electron microscopy (TEM), while imaging was performed using TEM energy dispersive X-ray spectroscopy (EDS). To characterize the pore distribution, an automatic adsorption instrument (Micromeritics ASAP 2020) was used to conduct  $\text{N}_2$  isothermal adsorption/desorption experiments, and the specific surface area was calculated according to the Brunauer-Emmet-Teller (BET) equation. Finally, the electrode samples obtained after these steps were used for XRD and XPS measurements.

### *Electrochemical measurements*

First, the cathode material was prepared by mixing the active material, carbon black and polytetrafluoroethylene (PVDF) in a mass ratio of 7:2:1 in n-methyl-2-

pyrrolidone (NMP) solvent and assembled into a CR2032 coin. type cells to evaluate the electrochemical performance of all samples. Subsequently, the slurry was coated on stainless steel foil and dried at 60 °C for 12 hours. At the same time, metal zinc discs, glass fibers and 3mol L<sup>-1</sup> zinc trifluoromethanesulfonate (Zn(CF<sub>3</sub>SO<sub>3</sub>)<sub>2</sub>) solution were used as anode, separator and electrolyte respectively. All batteries are assembled under natural conditions. The electrochemical properties were studied using cyclic voltammetry (CV) on an electrochemical workstation (CHI 760e) with scan rates between 0.2 and 1.6 V and a current density of 0.2 A g<sup>-1</sup>. The cycling and charge-discharge behavior of the button cells were tested using a battery test system (LAND MTI-5 V 10 mA). In addition, testing was performed by galvanostatic intermittent titration technique (GITT) using a series of galvanostatic discharge pulses (100 mA g<sup>-1</sup>, 10 minutes, 30 minutes rest) in the potential range of 0.2 ~ 1.6 V. All electrochemical tests were completed at room temperature.

#### *Energy Density and Power Density*

The energy density and power density were obtained by the following equations:

$$E = \int_0^{\Delta t} \frac{V \times i}{m} dt$$

$$P = \frac{E}{1000 \times \Delta t}$$

where  $E$  (Wh kg<sup>-1</sup>) is the energy density,  $P$  is the power density (kW kg<sup>-1</sup>),  $V$  (V),  $i$  (mA),  $m$  (g) and  $\Delta t$  (h) represent the working potential, discharging current, the mass loading of the cathode and the discharging time, respectively.

#### *Diffusion Coefficient*

The diffusion coefficient ( $D$ ) is obtained from the following equation,

$$D = \frac{4L^2}{\pi\tau} \left( \frac{\Delta E_s}{\Delta E t} \right)$$

where  $\tau$  (s) is the constant current pulse time. The  $L$  is diffusion length (cm) of  $Zn^{2+}$  and  $H^+$  which is equal to thickness of electrode. The  $\Delta E_s$  is the steady-state voltage change caused by the current pulse. The  $\Delta E_t$  are voltage changes during the constant current pulse.

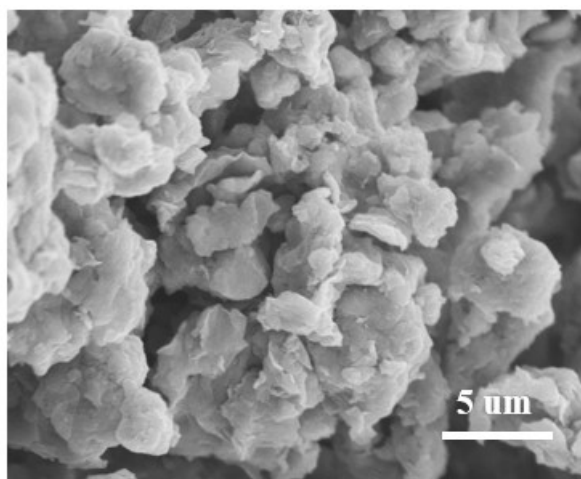

**Fig. S1.** SEM image of  $VO_2$ .

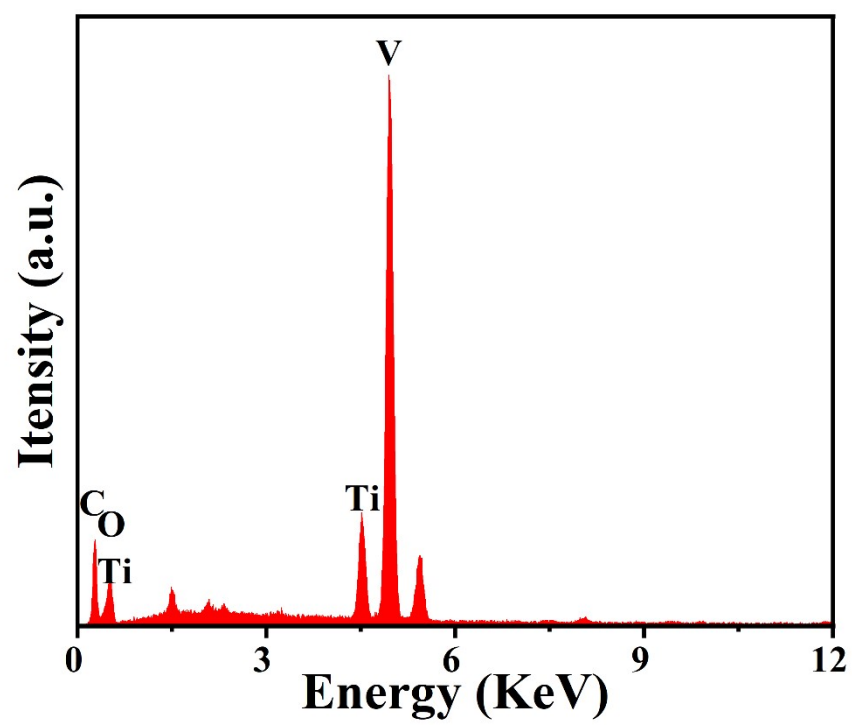

**Fig. S2.** EDS spectrum of the Ti-VO<sub>2</sub>

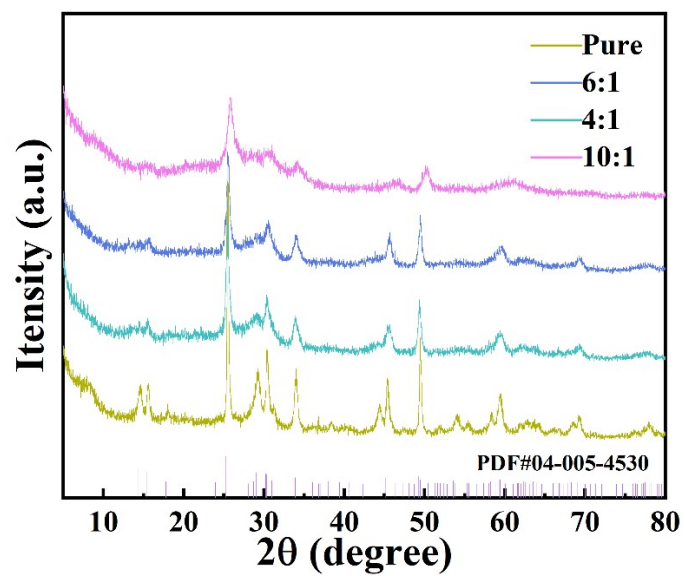

**Fig. S3.** XRD patterns of the Ti-doped VO<sub>2</sub> at varying proportions.

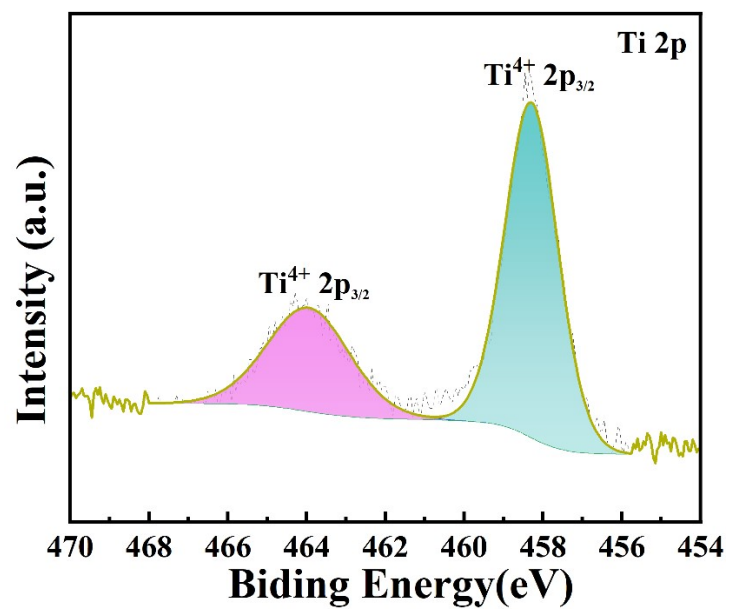

Fig. S4. Ti 2p fine spectrum of Ti-VO<sub>2</sub>

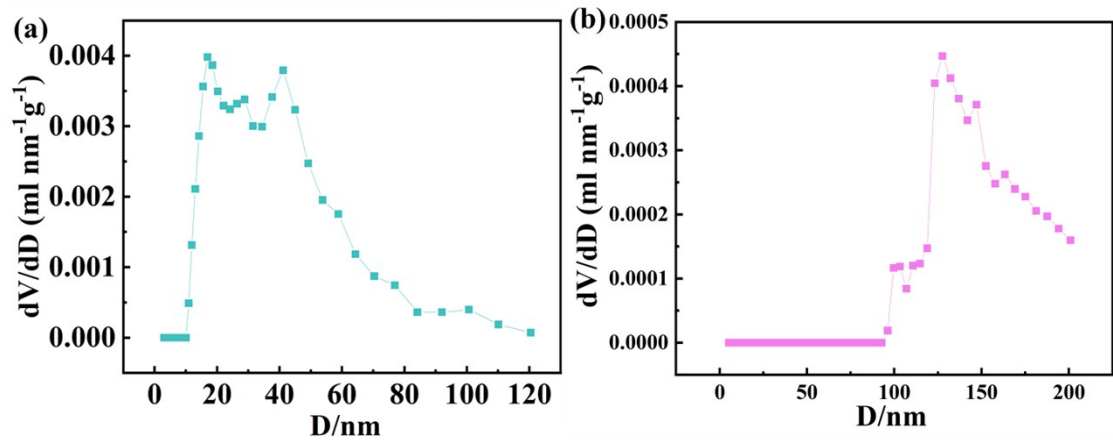

**Fig. S5.** (a) Ti-VO<sub>2</sub> pore size distribution; (b) VO<sub>2</sub> pore size distribution.



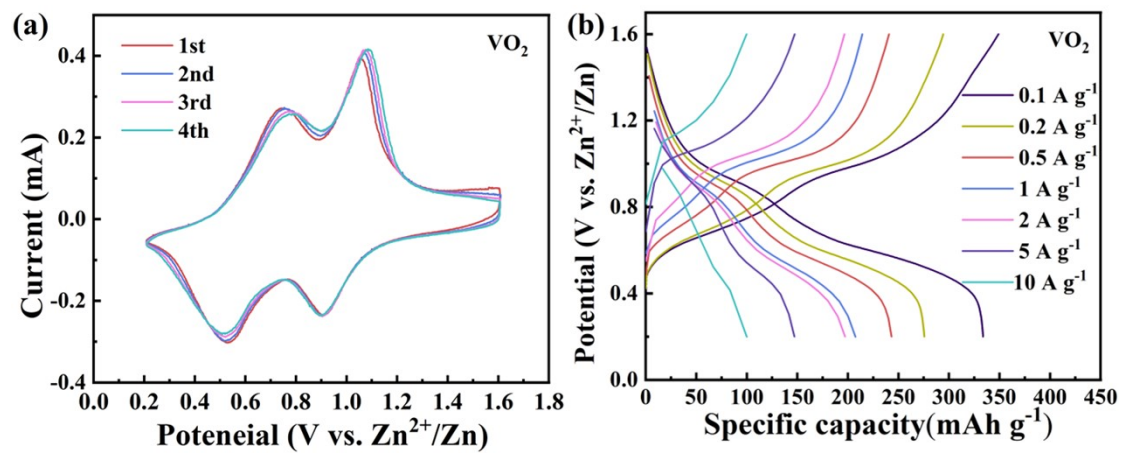

**Fig. S6.** (a) CV curves of VO<sub>2</sub> at 0.2 mV s<sup>-1</sup>; (b) GCD curves of VO<sub>2</sub> at different current densities.

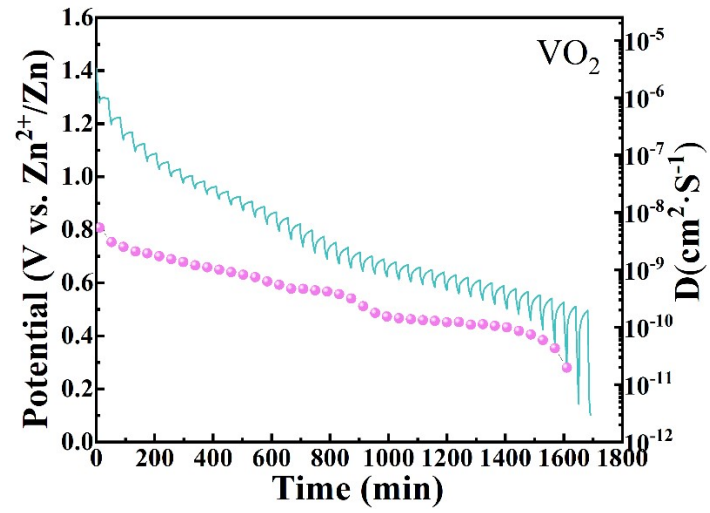

**Fig. S7.** GITT curve and corresponding diffusion coefficient of  $\text{VO}_2$  for ZIBs during discharge process.

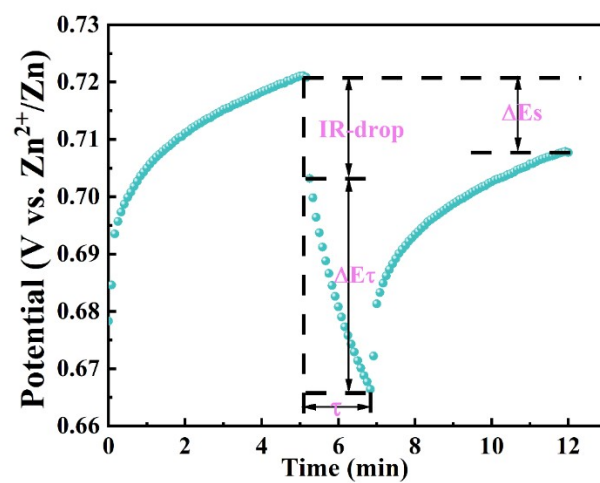

**Fig. S8.** Representative GITT titration curve.

**Table S1.** Performance comparison of aqueous ZIBs with vanadium oxide-based materials as cathodes.

| Cathode material                                                                 | Electrolyte                                             | Specific capacity                                       | Capacity retention                                               | Ref.      |
|----------------------------------------------------------------------------------|---------------------------------------------------------|---------------------------------------------------------|------------------------------------------------------------------|-----------|
| Ti-VO <sub>2</sub>                                                               | 3M<br>Zn(CF <sub>3</sub> SO <sub>3</sub> ) <sub>2</sub> | 399.58 mA h g <sup>-1</sup> at<br>0.2 A g <sup>-1</sup> | 89% retained after<br>r 100 cycles at 0.2<br>A g <sup>-1</sup>   | This work |
| VO <sub>2</sub> /MXene                                                           | 3M<br>Zn(CF <sub>3</sub> SO <sub>3</sub> ) <sub>2</sub> | 445 mA h g <sup>-1</sup> at<br>0.1 A g <sup>-1</sup>    | 82 % retained after<br>2600 cycles at 20<br>A g <sup>-1</sup>    | [1]       |
| V <sub>2</sub> O <sub>5</sub> ·nH <sub>2</sub> O                                 | 3M<br>Zn(CF <sub>3</sub> SO <sub>3</sub> ) <sub>2</sub> | 359 mA h g <sup>-1</sup> at<br>0.3 A g <sup>-1</sup>    | 90.9 % retained<br>after 1000 cycles<br>at 6.0 A g <sup>-1</sup> | [2]       |
| VS <sub>2</sub>                                                                  | 1 M<br>ZnSO <sub>4</sub>                                | 116 mA h g <sup>-1</sup> at<br>2.0 A g <sup>-1</sup>    | 98 % retained after<br>200 cycles at 0.5 A<br>g <sup>-1</sup>    | [3]       |
| K <sub>0.5</sub> V <sub>2</sub> O <sub>5</sub>                                   | 3M<br>Zn(CF <sub>3</sub> SO <sub>3</sub> ) <sub>2</sub> | 241 mA h g <sup>-1</sup> at 1<br>A g <sup>-1</sup>      | 90% retained after<br>1900 cycles at 5 A<br>g <sup>-1</sup>      | [4]       |
| (NH <sub>4</sub> ) <sub>x</sub> V <sub>2</sub> O <sub>5</sub> ·nH <sub>2</sub> O | 3M<br>Zn(CF <sub>3</sub> SO <sub>3</sub> ) <sub>2</sub> | 374 mA h g <sup>-1</sup> at<br>0.1 A g <sup>-1</sup>    | 80 % retained after<br>2000 cycles at 5.0<br>A g <sup>-1</sup>   | [5]       |
| Mg <sub>0.23</sub> V <sub>2</sub> O <sub>5</sub> ·H <sub>2</sub> O               | 1M<br>Zn(CF <sub>3</sub> SO <sub>3</sub> ) <sub>2</sub> | 255 mA h g <sup>-1</sup> at<br>0.5 A g <sup>-1</sup>    | 210% retained<br>after 100 cycles at<br>0.5 A g <sup>-1</sup>    | [6]       |
| VO <sub>2</sub> (A) hollow<br>spheres                                            | 3M<br>Zn(CF <sub>3</sub> SO <sub>3</sub> ) <sub>2</sub> | 357 mA h g <sup>-1</sup> at<br>0.1 A g <sup>-1</sup>    | 76 % retained after<br>500 cycles at 5.0 A<br>g <sup>-1</sup>    | [7]       |
| ZnV <sub>2</sub> O <sub>4</sub>                                                  | 2M<br>Zn(ClO <sub>4</sub> ) <sub>2</sub>                | 289 mA h g <sup>-1</sup> at<br>0.46 A g <sup>-1</sup>   | 76% retained after<br>1000 cycles at 4.6<br>A g <sup>-1</sup>    | [8]       |
| MgV <sub>2</sub> O <sub>4</sub>                                                  | 1M<br>Zn(CF <sub>3</sub> SO <sub>3</sub> ) <sub>2</sub> | 235 mA h g <sup>-1</sup> at 0.5<br>A g <sup>-1</sup>    | ~68% retained<br>after 500 cycles at<br>4.0 A g <sup>-1</sup>    | [9]       |
| VSe <sub>2</sub> Nanosheets                                                      | 3M<br>Zn(CF <sub>3</sub> SO <sub>3</sub> ) <sub>2</sub> | 131.8 mA h g <sup>-1</sup> at<br>0.1 A g <sup>-1</sup>  | 80.8 % retained<br>after 500 cycles at<br>2.0 A g <sup>-1</sup>  | [10]      |

## References

- [1] W. Kou, L. Yu, Q. Wang, Y. Yang, T. Yang, H. Geng, X. Miao, B. Gao, G. Yang, Enhanced  $\text{Zn}^{2+}$  transfer dynamics via a 3D bird nest-like  $\text{VO}_2/\text{MXene}$  heterojunction for ultrahigh-rate aqueous zinc-ion batteries, *Journal of Power Sources*, 520 (2022).
- [2] L. Chen, Y. Ruan, G. Zhang, Q. Wei, Y. Jiang, T. Xiong, P. He, W. Yang, M. Yan, Q. An, Ultrastable and high-performance  $\text{Zn}/\text{VO}_2$  battery based on a reversible single-phase reaction, *Chemistry of Materials*, 31 (2019) 699-706.
- [3] P. He, M. Yan, G. Zhang, R. Sun, L. Chen, Q. An, L. Mai, Layered  $\text{VS}_2$  nanosheet-based aqueous Zn ion battery cathode, *Advanced Energy Materials*, 7 (2017) 1601920.
- [4] G. Su, S. Chen, H. Dong, Y. Cheng, Q. Liu, H. Wei, E.H. Ang, H. Geng, C.C. Li, Tuning the electronic structure of layered vanadium pentoxide by pre-intercalation of potassium ions for superior room/low-temperature aqueous zinc-ion batteries, *Nanoscale*, 13 (2021) 2399-2407.
- [5] L. Xu, Y. Zhang, J. Zheng, H. Jiang, T. Hu, C. Meng, Ammonium ion intercalated hydrated vanadium pentoxide for advanced aqueous rechargeable Zn-ion batteries, *Materials Today Energy*, 18 (2020) 100509.
- [6] W. Xu, C. Liu, Q. Wu, W. Xie, W.-Y. Kim, S.-Y. Lee, J. Gwon, A stretchable solid-state zinc ion battery based on a cellulose nanofiber–polyacrylamide hydrogel electrolyte and a  $\text{Mg}_{0.23}\text{V}_2\text{O}_5 \cdot 1.0\text{H}_2\text{O}$  cathode, *Journal of Materials Chemistry A*, 8 (2020) 18327-18337.
- [7] L. Chen, Z. Yang, Y. Huang, Monoclinic  $\text{VO}_2(\text{D})$  hollow nanospheres with super-long cycle life for aqueous zinc ion batteries, *Nanoscale*, 11 (2019) 13032-13039.

- [8] Y. Liu, C. Li, J. Xu, M. Ou, C. Fang, S. Sun, Y. Qiu, J. Peng, G. Lu, Q. Li, Electroactivation-induced spinel  $\text{ZnV}_2\text{O}_4$  as a high-performance cathode material for aqueous zinc-ion battery, *Nano Energy*, 67 (2020) 104211.
- [9] W. Tang, B. Lan, C. Tang, Q. An, L. Chen, W. Zhang, C. Zuo, S. Dong, P. Luo, Urchin-like spinel  $\text{MgV}_2\text{O}_4$  as a cathode material for aqueous zinc-ion batteries, *ACS sustainable chemistry & engineering*, 8 (2020) 3681-3688.
- [10] Z. Wu, C. Lu, Y. Wang, L. Zhang, L. Jiang, W. Tian, C. Cai, Q. Gu, Z. Sun, L. Hu, Ultrathin  $\text{VSe}_2$  nanosheets with fast ion diffusion and robust structural stability for rechargeable zinc-ion battery cathode, *Small*, 16 (2020) 2000698.
